# Supplementary material for: Nano-scaled hierarchical porous ZnO nanostructures: fabrication and application in dye-sensitized solar cells
Source: Royal Society of Chemistry journal article supplement (doi:10.1039/c3ce40134k), 2013-01-01
Supplement: c3ce40134k.pdf [file c3ce40134k.pdf]

# Nano-scaled hierarchical porous ZnO nanostructures: fabrication and application in dye-sensitized solar cells

Li Wang, Xinghao Zhang, Kezheng Chen\*

\*Lab of Functional and Biomedical Nanomaterials, College of Materials  
Science and Engineering, Qingdao University of Science and Technology,  
Qingdao 266042, China. E-mail: [kchen@qust.edu.cn](mailto:kchen@qust.edu.cn); Fax: +86-532-84022509

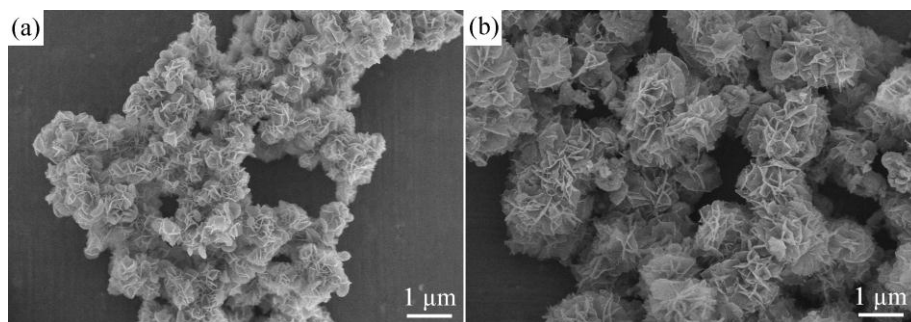

Figure S1 The SEM images of the products obtained with different amount of HMT (a) without HMT, (b) with large amount of HMT with a mole ratio of HMT/Zn = 2:1.

The morphologies of the products obtained with different amount HMT were also investigated. The HMT has less effect on the morphologies, but it is obvious that the presence of HMT is helpful to get mono-disperse hierarchical structures as shown in Figure S1a. To further increase the HMT content in the reaction with a mole ratio of HMT/Zn<sup>2+</sup> is 2:1, much larger structure was formed (Figure S1b).

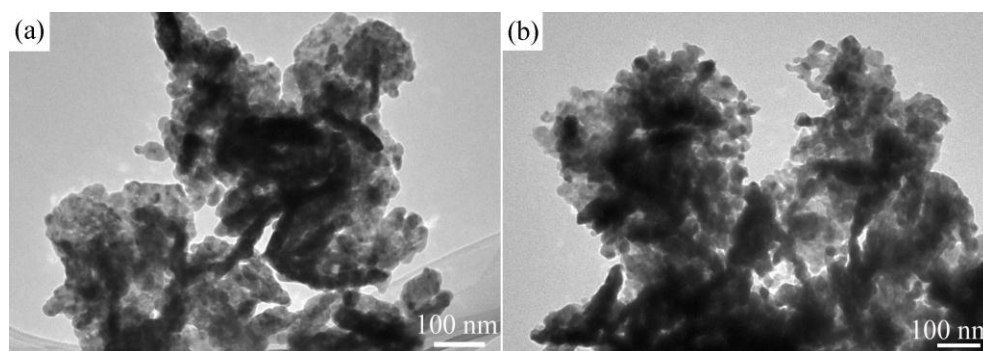

Figure S2 (a) ZnO obtained after 450 °C calcination. (b) ZnO obtained after 500 °C calcination.
